# Supplementary material
Source: PubMed Central journal article supplement (PMC4183735)

### Supplementary Figure Legend

**Supplementary Figure 1. IL-8 production by cultured intestinal tissue treated with cHMOS and PAMP-related molecules.** Healthy intestinal fragments exhibited low basal IL-8 secretion (control) that was not affected by human milk oligosaccharide preparations (cHMOS), but strongly responded to PAMP-associated stimuli with significant increases in IL-8 production (\* $P < 0.05$ , \*\* $P < 0.01$ ).

**Supplementary Figure 2. Layout of Raybio cytokine antibody membrane array.** (A) Cytokine membrane antibody array provided by Raybio Inc. (B) Typical images of cytokine profiles from media of immature intestinal mucosa cultured in the absence (HMOS-) or presence (HMOS+) of 5 mg/mL HMOS. 1= IL-1 $\beta$ ; 2= IL-4; 3= IL-6; 4= IL-12p70; 5= IL-13; 6= IL-17; 7= MCP-1; 8= TGF- $\beta$ 1; 9=TNF- $\beta$ .

Supplemental Figure 1

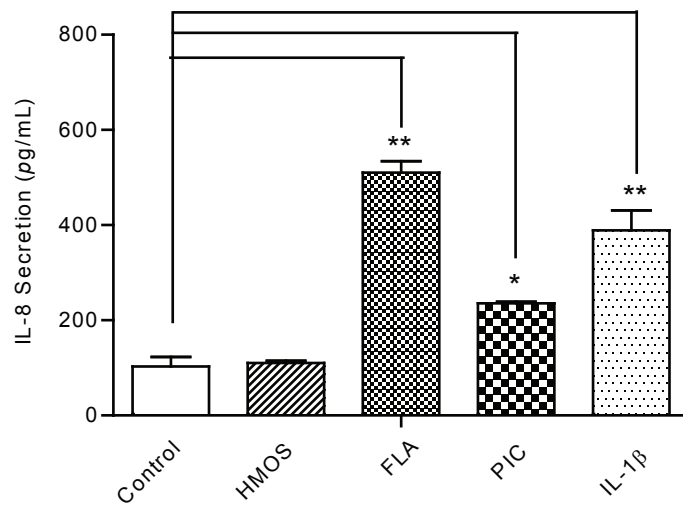

Supplemental Figure 2

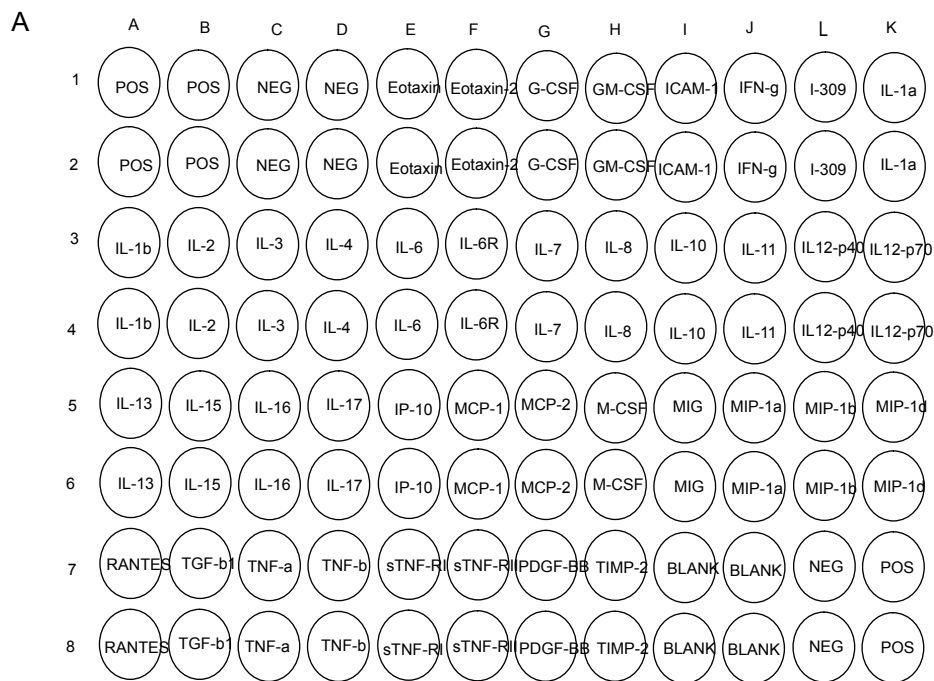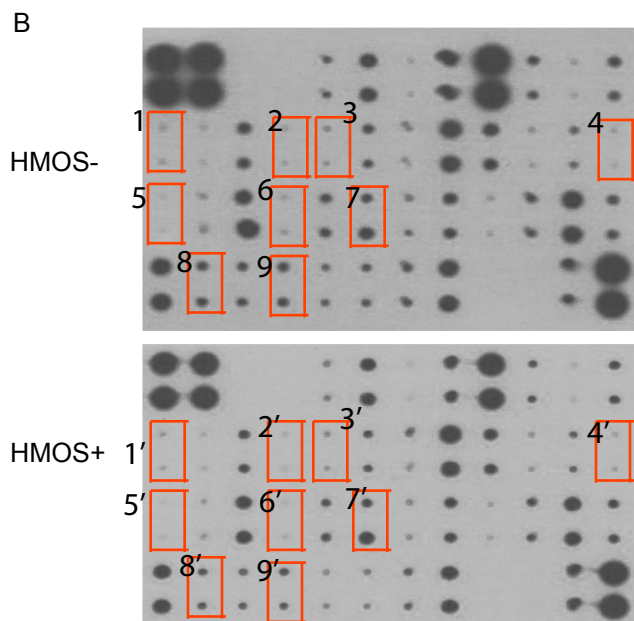

Supplement: NIHMS570297-supplement-supplement_1.pdf [file NIHMS570297-supplement-supplement_1.pdf]
